# Supplementary material
Source: PubMed Central journal article supplement (PMC7402377)
Supplement: mmc1.pdf [file mmc1.pdf]

**Supplementary Materials for**  
**Changes in air pollution levels after COVID-19 outbreak in Korea**

Supplementary Materials includes:

Supplemental Tables 1 to 9

Supplemental Figures 1 to 2

Supplemental Table 1. The year-on-year comparison of monthly mean of PM<sub>2.5</sub>, PM<sub>10</sub>, NO<sub>2</sub>, and CO in December.

| Year                                   | 2016          | 2017           | 2018                    | 2019                    |
|----------------------------------------|---------------|----------------|-------------------------|-------------------------|
| PM <sub>2.5</sub> (µg/m <sup>3</sup> ) | 28.17 ± 10.07 | 27.53 ± 14.74  | 24.21 ± 5.56            | 24.99 ± 10.51           |
| p-value                                | (ref)         | 0.862<br>(ref) | 0.093<br>0.260<br>(ref) | 0.257<br>0.419<br>0.722 |
| PM <sub>10</sub> (µg/m <sup>3</sup> )  | 45.07 ± 13.52 | 44.33 ± 18.14  | 43.52 ± 8.87            | 38.18 ± 13.18           |
| p-value                                | (ref)         | 0.878<br>(ref) | 0.655<br>0.802<br>(ref) | 0.075<br>0.132<br>0.079 |
| NO <sub>2</sub> (ppb)                  | 25.00 ± 6.52  | 23.56 ± 8.13   | 23.09 ± 4.06            | 23.58 ± 5.88            |
| p-value                                | (ref)         | 0.529<br>(ref) | 0.179<br>0.761<br>(ref) | 0.430<br>0.991<br>0.701 |
| CO (ppm)                               | 0.609 ± 0.124 | 0.581 ± 0.143  | 0.520 ± 0.063           | 0.557 ± 0.113           |
| p-value                                | (ref)         | 0.495<br>(ref) | 0.001<br>0.031<br>(ref) | 0.139<br>0.416<br>0.118 |

All values present mean ± SD of all daily concentrations per each month.

Paired *t*-test was used for comparison of PM<sub>2.5</sub>, PM<sub>10</sub>, NO<sub>2</sub>, and CO levels on the same day in the current year versus each prior year.

Supplemental Table 2. The year-on-year comparison of monthly mean of PM<sub>2.5</sub>, PM<sub>10</sub>, NO<sub>2</sub>, and CO in January.

| Year                                   | 2017          | 2018           | 2019                    | 2020                    |
|----------------------------------------|---------------|----------------|-------------------------|-------------------------|
| PM <sub>2.5</sub> (µg/m <sup>3</sup> ) | 30.58 ± 15.38 | 29.67 ± 14.63  | 33.24 ± 17.75           | 25.39 ± 10.80           |
| p-value                                | (ref)         | 0.797<br>(ref) | 0.561<br>0.348<br>(ref) | 0.038<br>0.209<br>0.046 |
| PM <sub>10</sub> (µg/m <sup>3</sup> )  | 49.15 ± 18.32 | 48.01 ± 19.25  | 57.48 ± 21.51           | 37.95 ± 14.33           |
| p-value                                | (ref)         | 0.775<br>(ref) | 0.149<br>0.068<br>(ref) | 0.002<br>0.018<br>0.001 |
| NO <sub>2</sub> (ppb)                  | 23.95 ± 7.98  | 23.77 ± 7.81   | 24.60 ± 6.11            | 21.47 ± 6.25            |
| p-value                                | (ref)         | 0.932<br>(ref) | 0.734<br>0.663<br>(ref) | 0.153<br>0.180<br>0.030 |
| CO (ppm)                               | 0.607 ± 0.157 | 0.601 ± 0.151  | 0.629 ± 0.136           | 0.572 ± 0.108           |
| p-value                                | (ref)         | 0.884<br>(ref) | 0.578<br>0.409<br>(ref) | 0.220<br>0.382<br>0.056 |

All values present mean ± SD of all daily concentrations per each month.

Paired *t*-test was used for comparison of PM<sub>2.5</sub>, PM<sub>10</sub>, NO<sub>2</sub>, and CO levels on the same day in the current year versus each prior year.

Supplemental Table 3. The year-on-year comparison of monthly mean of PM<sub>2.5</sub>, PM<sub>10</sub>, NO<sub>2</sub>, and CO in February.

| Year                                   | 2017          | 2018           | 2019                    | 2020                    |
|----------------------------------------|---------------|----------------|-------------------------|-------------------------|
| PM <sub>2.5</sub> (µg/m <sup>3</sup> ) | 26.61 ± 10.01 | 33.54 ± 12.71  | 33.16 ± 12.46           | 24.30 ± 11.86           |
| p-value                                | (ref)         | 0.059<br>(ref) | 0.032<br>0.905<br>(ref) | 0.484<br>0.011<br>0.020 |
| PM <sub>10</sub> (µg/m <sup>3</sup> )  | 43.96 ± 11.42 | 50.42 ± 15.09  | 54.93 ± 17.52           | 37.42 ± 15.51           |
| p-value                                | (ref)         | 0.128<br>(ref) | 0.002<br>0.380<br>(ref) | 0.122<br>0.003<br>0.001 |
| NO <sub>2</sub> (ppb)                  | 22.53 ± 8.17  | 22.94 ± 8.22   | 21.92 ± 5.73            | 19.56 ± 6.59            |
| p-value                                | (ref)         | 0.857<br>(ref) | 0.750<br>0.551<br>(ref) | 0.179<br>0.113<br>0.165 |
| CO (ppm)                               | 0.555 ± 0.123 | 0.556 ± 0.109  | 0.577 ± 0.079           | 0.515 ± 0.103           |
| p-value                                | (ref)         | 0.976<br>(ref) | 0.422<br>0.475<br>(ref) | 0.227<br>0.152<br>0.028 |

All values present mean ± SD of all daily concentrations per each month.

Paired *t*-test was used for comparison of PM<sub>2.5</sub>, PM<sub>10</sub>, NO<sub>2</sub>, and CO levels on the same day in the current year versus each prior year.

Supplemental Table 4. The year-on-year comparison of monthly mean of PM<sub>2.5</sub>, PM<sub>10</sub>, NO<sub>2</sub>, and CO in April.

| Year                                   | 2017          | 2018           | 2019                    | 2020                        |
|----------------------------------------|---------------|----------------|-------------------------|-----------------------------|
| PM <sub>2.5</sub> (µg/m <sup>3</sup> ) | 25.29 ± 7.67  | 24.86 ± 9.72   | 19.26 ± 6.12            | 18.04 ± 5.24                |
| p-value                                | (ref)         | 0.853<br>(ref) | 0.002<br>0.030<br>(ref) | < 0.001<br>0.002<br>0.471   |
| PM <sub>10</sub> (µg/m <sup>3</sup> )  | 55.06 ± 16.94 | 55.99 ± 24.05  | 40.85 ± 16.04           | 37.79 ± 12.13               |
| p-value                                | (ref)         | 0.866<br>(ref) | 0.002<br>0.008<br>(ref) | 0.001<br>0.005<br>0.734     |
| NO <sub>2</sub> (ppb)                  | 19.28 ± 4.27  | 17.73 ± 5.23   | 17.62 ± 3.39            | 13.12 ± 3.44                |
| p-value                                | (ref)         | 0.252<br>(ref) | 0.073<br>0.934<br>(ref) | < 0.001<br>0.002<br>< 0.001 |
| CO (ppm)                               | 0.455 ± 0.065 | 0.424 ± 0.047  | 0.412 ± 0.038           | 0.387 ± 0.040               |
| p-value                                | (ref)         | 0.045<br>(ref) | 0.001<br>0.361<br>(ref) | < 0.001<br>0.002<br>0.038   |

All values present mean ± SD of all daily concentrations per each month.

Paired *t*-test was used for comparison of PM<sub>2.5</sub>, PM<sub>10</sub>, NO<sub>2</sub>, and CO levels on the same day in the current year versus each prior year.

Supplemental Table 5. The year-on-year comparison of monthly mean of SO<sub>2</sub> and O<sub>3</sub> in December.

| Year                  | 2016         | 2017         | 2018         | 2019         |
|-----------------------|--------------|--------------|--------------|--------------|
| SO <sub>2</sub> (ppb) | 4.35 ± 0.61  | 3.90 ± 0.60  | 3.69 ± 0.60  | 3.41 ± 0.31  |
| p-value               | (ref)        | 0.025        | 0.001        | < 0.001      |
|                       |              | (ref)        | 0.156        | 0.001        |
|                       |              |              | (ref)        | 0.030        |
| O <sub>3</sub> (ppb)  | 16.20 ± 5.52 | 18.20 ± 4.72 | 17.91 ± 5.32 | 17.90 ± 5.12 |
| p-value               | (ref)        | 0.181        | 0.174        | 0.227        |
|                       |              | (ref)        | 0.827        | 0.798        |
|                       |              |              | (ref)        | 0.993        |

All values present mean ± SD of all daily concentrations per each month.

Paired *t*-test was used for comparison of SO<sub>2</sub> and O<sub>3</sub> levels on the same day in the current year versus each prior year.

Supplemental Table 6. The year-on-year comparison of monthly mean of SO<sub>2</sub> and O<sub>3</sub> in January.

| Year                  | 2017         | 2018         | 2019         | 2020         |
|-----------------------|--------------|--------------|--------------|--------------|
| SO <sub>2</sub> (ppb) | 4.62 ± 0.80  | 4.14 ± 0.55  | 4.25 ± 0.48  | 3.37 ± 0.43  |
| p-value               | (ref)        | 0.007        | 0.036        | < 0.001      |
|                       |              | (ref)        | 0.456        | < 0.001      |
|                       |              |              | (ref)        | < 0.001      |
| O <sub>3</sub> (ppb)  | 20.60 ± 6.29 | 19.49 ± 5.29 | 20.18 ± 4.29 | 20.99 ± 6.04 |
| p-value               | (ref)        | 0.414        | 0.767        | 0.770        |
|                       |              | (ref)        | 0.581        | 0.293        |
|                       |              |              | (ref)        | 0.512        |

All values present mean ± SD of all daily concentrations per each month.

Paired *t*-test was used for comparison of SO<sub>2</sub> and O<sub>3</sub> levels on the same day in the current year versus each prior year.

Supplemental Table 7. The year-on-year comparison of monthly mean of SO<sub>2</sub> and O<sub>3</sub> in February.

| Year                  | 2017         | 2018         | 2019         | 2020         |
|-----------------------|--------------|--------------|--------------|--------------|
| SO <sub>2</sub> (ppb) | 4.54 ± 0.79  | 4.37 ± 0.64  | 3.88 ± 0.45  | 3.12 ± 0.38  |
| p-value               | (ref)        | 0.403        | 0.002        | < 0.001      |
|                       |              | (ref)        | 0.003        | < 0.001      |
|                       |              |              | (ref)        | < 0.001      |
| O <sub>3</sub> (ppb)  | 26.46 ± 6.80 | 26.01 ± 5.18 | 26.12 ± 5.13 | 25.89 ± 5.69 |
| p-value               | (ref)        | 0.757        | 0.828        | 0.828        |
|                       |              | (ref)        | 0.922        | 0.969        |
|                       |              |              | (ref)        | 0.974        |

All values present mean ± SD of all daily concentrations per each month.

Paired *t*-test was used for comparison of SO<sub>2</sub> and O<sub>3</sub> levels on the same day in the current year versus each prior year.



Supplemental Table 8. The year-on-year comparison of monthly mean of SO<sub>2</sub> and O<sub>3</sub> in March.

| Year                  | 2017         | 2018         | 2019         | 2020         |
|-----------------------|--------------|--------------|--------------|--------------|
| SO <sub>2</sub> (ppb) | 4.84 ± 0.92  | 3.72 ± 0.72  | 3.67 ± 0.63  | 3.05 ± 0.24  |
| p-value               | (ref)        | < 0.001      | < 0.001      | < 0.001      |
|                       |              | (ref)        | 0.781        | < 0.001      |
|                       |              |              | (ref)        | < 0.001      |
| O <sub>3</sub> (ppb)  | 33.77 ± 4.32 | 32.96 ± 6.81 | 37.04 ± 5.70 | 33.58 ± 5.87 |
| p-value               | (ref)        | 0.582        | 0.012        | 0.901        |
|                       |              | (ref)        | 0.003        | 0.708        |
|                       |              |              | (ref)        | 0.030        |

All values present mean ± SD of all daily concentrations per each month.

Paired *t*-test was used for comparison of SO<sub>2</sub> and O<sub>3</sub> levels on the same day in the current year versus each prior year.

Supplemental Table 9. The year-on-year comparison of monthly mean of SO<sub>2</sub> and O<sub>3</sub> in April.

| Year                  | 2017         | 2018         | 2019         | 2020         |
|-----------------------|--------------|--------------|--------------|--------------|
| SO <sub>2</sub> (ppb) | 4.62 ± 0.80  | 4.14 ± 0.55  | 4.25 ± 0.48  | 3.37 ± 0.43  |
| p-value               | (ref)        | 0.006        | < 0.001      | < 0.001      |
|                       |              | (ref)        | 0.495        | < 0.001      |
|                       |              |              | (ref)        | < 0.001      |
| O <sub>3</sub> (ppb)  | 41.91 ± 8.92 | 38.35 ± 6.52 | 37.16 ± 5.42 | 42.25 ± 5.29 |
| p-value               | (ref)        | 0.045        | 0.040        | 0.831        |
|                       |              | (ref)        | 0.532        | 0.008        |
|                       |              |              | (ref)        | 0.004        |

All values present mean ± SD of all daily concentrations per each month.

Paired *t*-test was used for comparison of SO<sub>2</sub> and O<sub>3</sub> levels on the same day in the current year versus each prior year.

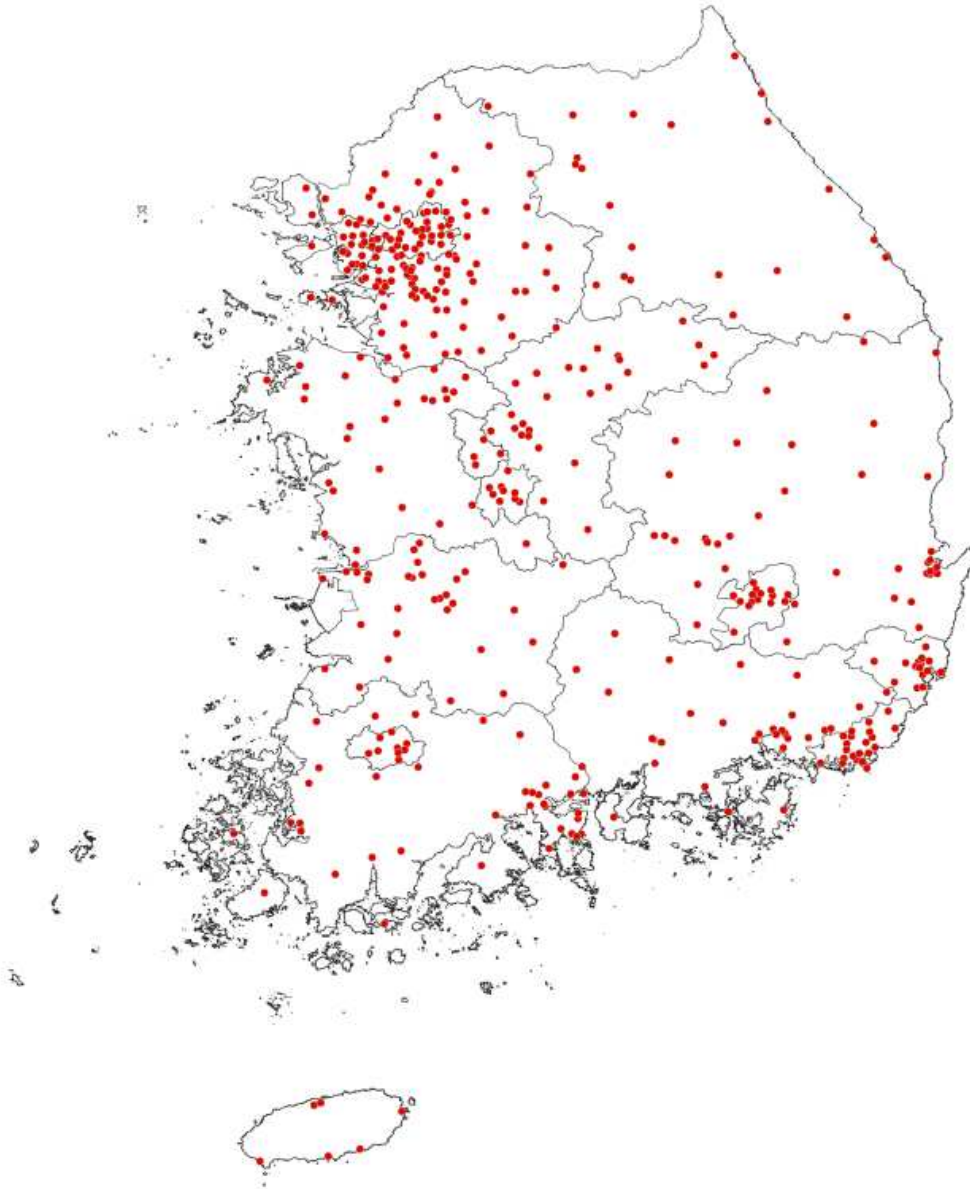

**Supplemental Figure 1. The location of monitoring stations in Korea.**

Red dots present the location of monitoring stations.

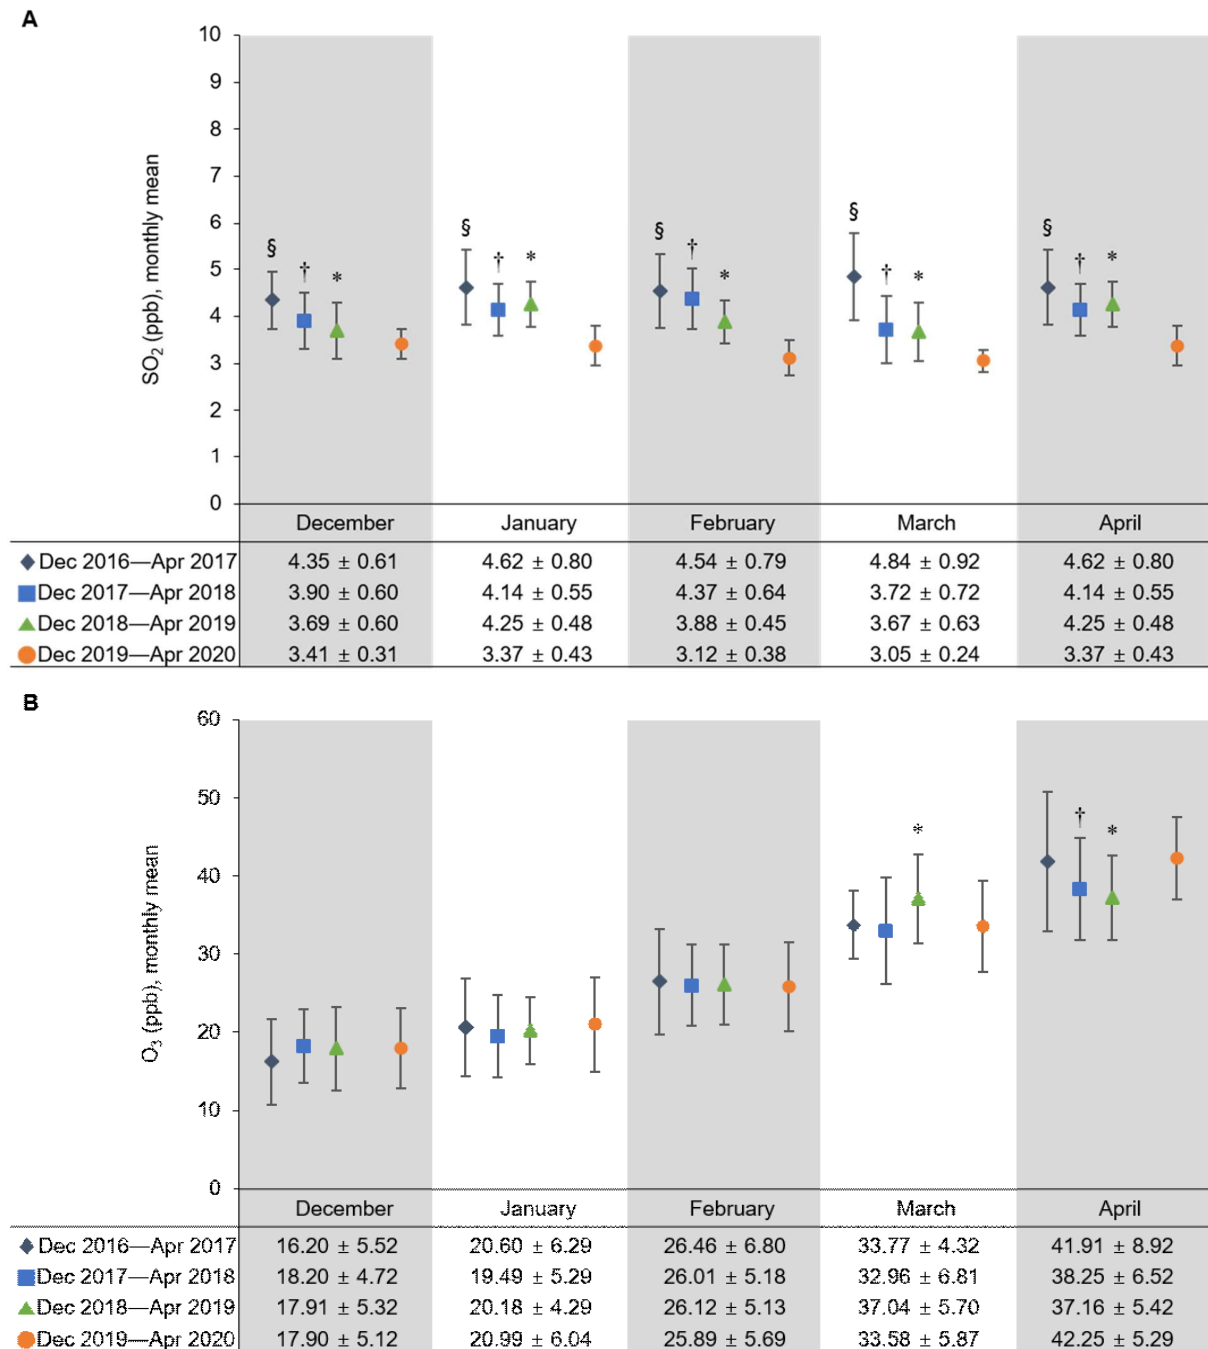

**Supplemental Figure 2. Monthly mean ± standard deviation of air pollutants in Korea, between December and April of the most recent four years.**

All values present mean ± standard deviation of all daily concentrations per each month.

Paired *t*-test was used for comparison of (A) SO<sub>2</sub> and (B) O<sub>3</sub> levels on the same day in the current year versus each prior year.

\* *p* < 0.05 vs. 1 prior year; † *p* < 0.05 vs. 2 prior year; § *p* < 0.05 vs. 3 prior year
